# Supplementary material for: Global soil profiles indicate depth-dependent soil carbon losses under a warmer climate
Source: PubMed Central journal article supplement (PMC9489695; doi:10.1038/s41467-022-33278-w), 2022-09-20
Supplement: 41467_2022_33278_MOESM3_ESM.pdf [file 41467_2022_33278_MOESM3_ESM.pdf]

## **Description of Additional Supplementary Files**

File Name: Supplementary Data 1

Description: Data from field warming experiments and references used to collect the data.
